# Supplementary material
Source: MDPI journal article supplement (https://www.mdpi.com/1999-4907/14/9/1825)
Supplement: s1 [file Table S2_ValidationStatistics.xlsx]

## Sheet: TableS2_ValidationStatistics
Table S2. Summary validation statistics for the predictive linear models built for each of the indices tested. For each statistics, mean and range (between brackets) of models fitted using all possible combinations of N leaves for calibration, leaving the rest of leaves for validation. N leaves, number of leaves used for calibration; N models, number of models fitted; N cal and N val, number of o…
N leaves	Index type	Index	N models	N cal	N val	R2	RMSE	MAE
1	Band	R1450	16	10	150	0.94 [0.94 0.95]	4.5 [3.9 5.6]	3.6 [3.1 4.4]
1	Band	R1599	16	10	150	0.92 [0.92 0.92]	5.5 [4.7 7.2]	4.4 [3.7 5.9]
1	Band	R1940	16	10	150	0.89 [0.88 0.89]	6.3 [5.5 7.8]	5.1 [4.5 6.3]
1	Ratio	R1450_R820	16	10	150	0.89 [0.88 0.89]	6.6 [5.5 8.5]	5.4 [4.5 7.1]
1	Ratio	R1599_R820	16	10	150	0.67 [0.66 0.68]	11.8 [9.5 17.2]	9.6 [7.6 13.8]
1	Ratio	R1940_R820	16	10	150	0.84 [0.83 0.85]	7.6 [6.5 10.6]	6.2 [5.2 8.8]
1	LWCI	LWCI1450_820	16	10	150	0.94 [0.94 0.95]	4.3 [4.0 5.7]	3.4 [3.1 4.7]
1	LWCI	LWCI1599_820	16	10	150	0.92 [0.92 0.93]	4.9 [4.6 5.9]	3.9 [3.7 4.6]
1	LWCI	LWCI1940_820	16	10	150	0.89 [0.89 0.90]	5.8 [5.3 8.3]	4.6 [4.2 6.8]
2	Band	R1450	120	20	140	0.94 [0.94 0.95]	4.3 [3.9 5.5]	3.4 [3.1 4.3]
2	Band	R1599	120	20	140	0.92 [0.91 0.93]	5.1 [4.6 6.8]	4.1 [3.6 5.5]
2	Band	R1940	120	20	140	0.89 [0.88 0.90]	5.9 [5.4 7.8]	4.8 [4.4 6.2]
2	Ratio	R1450_R820	120	20	140	0.89 [0.88 0.90]	6.0 [5.3 7.8]	4.9 [4.3 6.4]
2	Ratio	R1599_R820	120	20	140	0.67 [0.64 0.70]	10.5 [8.9 16.8]	8.5 [7.2 13.7]
2	Ratio	R1940_R820	120	20	140	0.84 [0.83 0.86]	7.1 [6.1 10.1]	5.7 [4.9 8.5]
2	LWCI	LWCI1450_820	120	20	140	0.94 [0.94 0.95]	4.1 [3.8 5.3]	3.3 [3.0 4.3]
2	LWCI	LWCI1599_820	120	20	140	0.92 [0.92 0.93]	4.7 [4.3 5.7]	3.8 [3.5 4.3]
2	LWCI	LWCI1940_820	120	20	140	0.89 [0.89 0.92]	5.6 [5.0 8.2]	4.4 [4.1 6.7]
3	Band	R1450	560	30	130	0.94 [0.94 0.95]	4.2 [3.7 5.3]	3.4 [3.0 4.2]
3	Band	R1599	560	30	130	0.92 [0.91 0.93]	5.0 [4.2 6.4]	4.0 [3.4 5.3]
3	Band	R1940	560	30	130	0.89 [0.87 0.90]	5.8 [5.1 7.5]	4.7 [4.3 5.9]
3	Ratio	R1450_R820	560	30	130	0.89 [0.88 0.90]	5.8 [5.1 7.7]	4.8 [4.2 6.4]
3	Ratio	R1599_R820	560	30	130	0.67 [0.63 0.71]	10.1 [8.9 16.3]	8.1 [7.0 13.3]
3	Ratio	R1940_R820	560	30	130	0.84 [0.82 0.87]	6.9 [5.9 9.5]	5.6 [4.8 8.1]
3	LWCI	LWCI1450_820	560	30	130	0.94 [0.94 0.95]	4.1 [3.6 4.8]	3.2 [2.9 3.8]
3	LWCI	LWCI1599_820	560	30	130	0.92 [0.91 0.93]	4.7 [4.1 5.6]	3.7 [3.4 4.2]
3	LWCI	LWCI1940_820	560	30	130	0.90 [0.88 0.92]	5.5 [4.8 6.9]	4.3 [3.9 5.5]
4	Band	R1450	1820	40	120	0.94 [0.93 0.95]	4.1 [3.5 5.2]	3.3 [2.9 4.1]
4	Band	R1599	1820	40	120	0.92 [0.91 0.94]	4.9 [4.1 6.4]	3.9 [3.3 5.4]
4	Band	R1940	1820	40	120	0.89 [0.87 0.91]	5.7 [5.0 7.1]	4.7 [4.2 5.7]
4	Ratio	R1450_R820	1820	40	120	0.89 [0.87 0.90]	5.8 [5.0 7.9]	4.7 [4.1 6.6]
4	Ratio	R1599_R820	1820	40	120	0.67 [0.62 0.73]	9.9 [8.5 15.7]	8.0 [6.8 13.0]
4	Ratio	R1940_R820	1820	40	120	0.84 [0.82 0.88]	6.8 [5.9 8.8]	5.5 [4.7 7.3]
4	LWCI	LWCI1450_820	1820	40	120	0.94 [0.93 0.95]	4.0 [3.5 4.7]	3.2 [2.9 3.6]
4	LWCI	LWCI1599_820	1820	40	120	0.92 [0.91 0.94]	4.7 [4.1 5.4]	3.7 [3.3 4.1]
4	LWCI	LWCI1940_820	1820	40	120	0.90 [0.88 0.92]	5.4 [4.8 6.3]	4.3 [3.9 4.9]
5	Band	R1450	4368	50	110	0.94 [0.93 0.96]	4.1 [3.4 5.2]	3.3 [2.9 4.1]
5	Band	R1599	4368	50	110	0.92 [0.90 0.94]	4.9 [3.9 6.3]	3.9 [3.2 5.4]
5	Band	R1940	4368	50	110	0.89 [0.87 0.91]	5.7 [4.9 6.9]	4.6 [4.1 5.5]
5	Ratio	R1450_R820	4368	50	110	0.89 [0.87 0.91]	5.7 [4.9 7.9]	4.7 [4.0 6.6]
5	Ratio	R1599_R820	4368	50	110	0.67 [0.61 0.74]	9.8 [8.4 15.1]	7.9 [6.7 12.5]
5	Ratio	R1940_R820	4368	50	110	0.84 [0.81 0.88]	6.7 [5.5 8.4]	5.4 [4.4 7.1]
5	LWCI	LWCI1450_820	4368	50	110	0.94 [0.93 0.95]	4.0 [3.4 4.6]	3.2 [2.8 3.6]
5	LWCI	LWCI1599_820	4368	50	110	0.92 [0.91 0.94]	4.6 [3.9 5.4]	3.7 [3.3 4.1]
5	LWCI	LWCI1940_820	4368	50	110	0.90 [0.87 0.92]	5.4 [4.5 6.2]	4.3 [3.7 4.7]
6	Band	R1450	8008	60	100	0.94 [0.93 0.96]	4.0 [3.3 5.2]	3.3 [2.8 4.1]
6	Band	R1599	8008	60	100	0.92 [0.90 0.95]	4.8 [3.9 6.3]	3.8 [3.1 5.1]
6	Band	R1940	8008	60	100	0.89 [0.86 0.91]	5.6 [4.6 6.8]	4.6 [3.9 5.5]
6	Ratio	R1450_R820	8008	60	100	0.89 [0.86 0.91]	5.7 [4.8 7.6]	4.6 [4.0 6.4]
6	Ratio	R1599_R820	8008	60	100	0.67 [0.60 0.75]	9.7 [8.3 14.6]	7.8 [6.5 12.1]
6	Ratio	R1940_R820	8008	60	100	0.84 [0.81 0.89]	6.7 [5.4 8.2]	5.4 [4.4 7.0]
6	LWCI	LWCI1450_820	8008	60	100	0.94 [0.93 0.96]	4.0 [3.3 4.6]	3.2 [2.8 3.6]
6	LWCI	LWCI1599_820	8008	60	100	0.92 [0.90 0.94]	4.6 [3.9 5.3]	3.7 [3.2 4.1]
6	LWCI	LWCI1940_820	8008	60	100	0.90 [0.87 0.93]	5.4 [4.4 6.3]	4.2 [3.7 4.7]
7	Band	R1450	11440	70	90	0.94 [0.93 0.96]	4.0 [3.3 5.1]	3.3 [2.7 4.1]
7	Band	R1599	11440	70	90	0.92 [0.90 0.95]	4.8 [3.7 6.3]	3.8 [3.1 5.1]
7	Band	R1940	11440	70	90	0.89 [0.86 0.92]	5.6 [4.5 6.7]	4.6 [3.8 5.5]
7	Ratio	R1450_R820	11440	70	90	0.89 [0.86 0.92]	5.6 [4.7 7.3]	4.6 [3.9 6.2]
7	Ratio	R1599_R820	11440	70	90	0.67 [0.59 0.76]	9.7 [8.0 13.5]	7.8 [6.3 11.2]
7	Ratio	R1940_R820	11440	70	90	0.85 [0.80 0.89]	6.6 [5.2 8.2]	5.4 [4.2 6.9]
7	LWCI	LWCI1450_820	11440	70	90	0.94 [0.93 0.96]	4.0 [3.3 4.7]	3.2 [2.7 3.6]
7	LWCI	LWCI1599_820	11440	70	90	0.92 [0.90 0.94]	4.6 [3.8 5.3]	3.7 [3.1 4.2]
7	LWCI	LWCI1940_820	11440	70	90	0.90 [0.86 0.93]	5.4 [4.3 6.3]	4.2 [3.6 4.7]
8	Band	R1450	12870	80	80	0.94 [0.93 0.96]	4.0 [3.2 5.1]	3.2 [2.7 4.1]
8	Band	R1599	12870	80	80	0.92 [0.89 0.95]	4.8 [3.6 6.4]	3.8 [3.0 5.2]
8	Band	R1940	12870	80	80	0.89 [0.85 0.92]	5.6 [4.4 6.7]	4.6 [3.8 5.6]
8	Ratio	R1450_R820	12870	80	80	0.89 [0.85 0.92]	5.6 [4.6 7.1]	4.6 [3.8 6.2]
8	Ratio	R1599_R820	12870	80	80	0.67 [0.58 0.76]	9.6 [7.9 13.0]	7.7 [6.2 10.8]
8	Ratio	R1940_R820	12870	80	80	0.85 [0.79 0.90]	6.6 [5.1 8.2]	5.3 [4.1 7.0]
8	LWCI	LWCI1450_820	12870	80	80	0.94 [0.92 0.96]	4.0 [3.2 4.7]	3.2 [2.7 3.7]
8	LWCI	LWCI1599_820	12870	80	80	0.92 [0.90 0.95]	4.6 [3.7 5.4]	3.7 [3.1 4.2]
8	LWCI	LWCI1940_820	12870	80	80	0.90 [0.86 0.93]	5.3 [4.2 6.4]	4.2 [3.5 4.8]
9	Band	R1450	11440	90	70	0.94 [0.92 0.96]	4.0 [3.2 5.1]	3.2 [2.7 4.1]
9	Band	R1599	11440	90	70	0.92 [0.89 0.96]	4.8 [3.6 6.5]	3.8 [3.0 5.3]
9	Band	R1940	11440	90	70	0.89 [0.85 0.93]	5.6 [4.3 6.7]	4.6 [3.7 5.7]
9	Ratio	R1450_R820	11440	90	70	0.89 [0.85 0.93]	5.6 [4.5 7.0]	4.6 [3.7 6.2]
9	Ratio	R1599_R820	11440	90	70	0.67 [0.57 0.78]	9.6 [7.8 12.8]	7.7 [6.1 10.7]
9	Ratio	R1940_R820	11440	90	70	0.85 [0.78 0.91]	6.6 [5.0 8.3]	5.3 [4.0 7.1]
9	LWCI	LWCI1450_820	11440	90	70	0.94 [0.92 0.96]	4.0 [3.2 4.8]	3.2 [2.6 3.8]
9	LWCI	LWCI1599_820	11440	90	70	0.92 [0.89 0.95]	4.6 [3.6 5.5]	3.7 [3.0 4.3]
9	LWCI	LWCI1940_820	11440	90	70	0.90 [0.85 0.94]	5.3 [4.1 6.6]	4.2 [3.5 5.0]
10	Band	R1450	8008	100	60	0.94 [0.92 0.97]	4.0 [3.2 5.1]	3.2 [2.7 4.0]
10	Band	R1599	8008	100	60	0.92 [0.88 0.96]	4.7 [3.5 6.5]	3.8 [2.9 5.3]
10	Band	R1940	8008	100	60	0.89 [0.85 0.93]	5.6 [4.2 6.9]	4.6 [3.6 5.9]
10	Ratio	R1450_R820	8008	100	60	0.89 [0.84 0.93]	5.6 [4.4 7.1]	4.6 [3.7 6.2]
10	Ratio	R1599_R820	8008	100	60	0.68 [0.56 0.80]	9.6 [7.6 12.8]	7.7 [6.0 10.6]
10	Ratio	R1940_R820	8008	100	60	0.85 [0.77 0.91]	6.6 [4.9 8.5]	5.3 [3.9 7.3]
10	LWCI	LWCI1450_820	8008	100	60	0.94 [0.92 0.96]	4.0 [3.1 5.0]	3.2 [2.6 3.9]
10	LWCI	LWCI1599_820	8008	100	60	0.92 [0.89 0.95]	4.6 [3.6 5.6]	3.7 [2.9 4.4]
10	LWCI	LWCI1940_820	8008	100	60	0.90 [0.85 0.94]	5.3 [4.1 6.8]	4.2 [3.4 5.1]
11	Band	R1450	4368	110	50	0.95 [0.92 0.97]	4.0 [3.1 5.1]	3.2 [2.6 4.0]
11	Band	R1599	4368	110	50	0.93 [0.88 0.97]	4.7 [3.4 6.7]	3.8 [2.9 5.4]
11	Band	R1940	4368	110	50	0.89 [0.84 0.93]	5.6 [4.2 7.0]	4.6 [3.6 6.0]
11	Ratio	R1450_R820	4368	110	50	0.89 [0.84 0.94]	5.6 [4.3 7.1]	4.6 [3.6 6.2]
11	Ratio	R1599_R820	4368	110	50	0.68 [0.54 0.82]	9.5 [7.5 12.5]	7.7 [5.9 10.4]
11	Ratio	R1940_R820	4368	110	50	0.85 [0.77 0.91]	6.6 [4.8 8.7]	5.3 [3.8 7.5]
11	LWCI	LWCI1450_820	4368	110	50	0.94 [0.91 0.96]	4.0 [3.1 5.1]	3.2 [2.6 4.0]
11	LWCI	LWCI1599_820	4368	110	50	0.92 [0.88 0.95]	4.6 [3.5 5.8]	3.7 [2.9 4.5]
11	LWCI	LWCI1940_820	4368	110	50	0.90 [0.84 0.94]	5.3 [4.0 7.1]	4.2 [3.3 5.3]
12	Band	R1450	1820	120	40	0.95 [0.91 0.97]	4.0 [3.1 5.2]	3.2 [2.6 4.0]
12	Band	R1599	1820	120	40	0.93 [0.87 0.97]	4.7 [3.3 6.7]	3.8 [2.8 5.4]
12	Band	R1940	1820	120	40	0.89 [0.84 0.94]	5.5 [4.1 7.1]	4.6 [3.5 6.1]
12	Ratio	R1450_R820	1820	120	40	0.89 [0.84 0.95]	5.6 [4.1 7.0]	4.6 [3.4 6.0]
12	Ratio	R1599_R820	1820	120	40	0.69 [0.52 0.84]	9.5 [7.3 12.5]	7.7 [5.6 10.3]
12	Ratio	R1940_R820	1820	120	40	0.85 [0.77 0.92]	6.5 [4.7 9.1]	5.3 [3.7 8.0]
12	LWCI	LWCI1450_820	1820	120	40	0.94 [0.91 0.97]	3.9 [3.0 5.4]	3.2 [2.5 4.2]
12	LWCI	LWCI1599_820	1820	120	40	0.92 [0.88 0.96]	4.6 [3.4 5.9]	3.7 [2.8 4.7]
12	LWCI	LWCI1940_820	1820	120	40	0.90 [0.84 0.95]	5.3 [3.9 7.6]	4.2 [3.3 5.7]
13	Band	R1450	560	130	30	0.95 [0.91 0.97]	4.0 [3.0 5.3]	3.2 [2.5 4.1]
13	Band	R1599	560	130	30	0.93 [0.87 0.97]	4.7 [3.2 6.6]	3.8 [2.7 5.4]
13	Band	R1940	560	130	30	0.90 [0.84 0.94]	5.5 [4.0 7.3]	4.6 [3.3 6.2]
13	Ratio	R1450_R820	560	130	30	0.90 [0.83 0.95]	5.5 [4.1 7.1]	4.6 [3.3 6.0]
13	Ratio	R1599_R820	560	130	30	0.70 [0.47 0.87]	9.5 [7.2 12.0]	7.6 [5.3 9.9]
13	Ratio	R1940_R820	560	130	30	0.86 [0.77 0.92]	6.5 [4.5 9.1]	5.3 [3.6 8.1]
13	LWCI	LWCI1450_820	560	130	30	0.95 [0.91 0.97]	3.9 [2.9 5.8]	3.2 [2.4 4.5]
13	LWCI	LWCI1599_820	560	130	30	0.92 [0.88 0.96]	4.5 [3.3 6.2]	3.7 [2.6 4.9]
13	LWCI	LWCI1940_820	560	130	30	0.90 [0.84 0.95]	5.2 [3.8 8.2]	4.2 [3.2 6.1]
14	Band	R1450	120	140	20	0.95 [0.90 0.97]	3.9 [2.9 5.5]	3.2 [2.5 4.2]
14	Band	R1599	120	140	20	0.94 [0.86 0.98]	4.6 [3.1 6.7]	3.8 [2.5 5.3]
14	Band	R1940	120	140	20	0.90 [0.83 0.95]	5.5 [3.9 7.6]	4.6 [3.2 6.3]
14	Ratio	R1450_R820	120	140	20	0.90 [0.83 0.96]	5.5 [4.0 7.3]	4.6 [3.2 6.1]
14	Ratio	R1599_R820	120	140	20	0.71 [0.49 0.89]	9.5 [7.0 12.1]	7.6 [5.0 10.1]
14	Ratio	R1940_R820	120	140	20	0.87 [0.76 0.93]	6.5 [4.2 9.2]	5.3 [3.5 8.0]
14	LWCI	LWCI1450_820	120	140	20	0.95 [0.91 0.97]	3.9 [2.9 6.4]	3.2 [2.3 5.0]
14	LWCI	LWCI1599_820	120	140	20	0.93 [0.88 0.96]	4.5 [3.2 6.6]	3.7 [2.5 5.1]
14	LWCI	LWCI1940_820	120	140	20	0.91 [0.83 0.95]	5.2 [3.6 9.3]	4.2 [3.1 7.0]
15	Band	R1450	16	150	10	0.96 [0.92 0.98]	3.9 [2.7 6.0]	3.2 [2.5 4.4]
15	Band	R1599	16	150	10	0.95 [0.89 0.98]	4.6 [3.0 7.2]	3.7 [2.3 5.6]
15	Band	R1940	16	150	10	0.92 [0.89 0.96]	5.4 [3.5 8.0]	4.6 [3.0 6.4]
15	Ratio	R1450_R820	16	150	10	0.93 [0.82 0.97]	5.5 [3.9 7.4]	4.6 [3.1 6.1]
15	Ratio	R1599_R820	16	150	10	0.78 [0.41 0.94]	9.4 [6.7 12.2]	7.6 [4.5 10.1]
15	Ratio	R1940_R820	16	150	10	0.90 [0.85 0.95]	6.4 [3.7 9.2]	5.3 [3.0 8.2]
15	LWCI	LWCI1450_820	16	150	10	0.95 [0.93 0.97]	3.8 [2.7 7.2]	3.2 [2.3 5.6]
15	LWCI	LWCI1599_820	16	150	10	0.93 [0.85 0.96]	4.5 [3.2 7.6]	3.7 [2.5 5.8]
15	LWCI	LWCI1940_820	16	150	10	0.92 [0.89 0.96]	5.1 [3.5 9.7]	4.2 [2.9 7.6]
